# Supplementary material for: A metabolism-related gene signature for predicting the prognosis and therapeutic responses in patients with hepatocellular carcinoma
Source: PubMed Central journal article supplement — Ann Transl Med. 2021 Mar;9(6):500. doi: 10.21037/atm-21-927 (PMC8039687; doi:10.21037/atm-21-927), 2021-03
Supplement: atm-09-06-500-supplementary.pdf [file atm-09-06-500-supplementary.pdf]

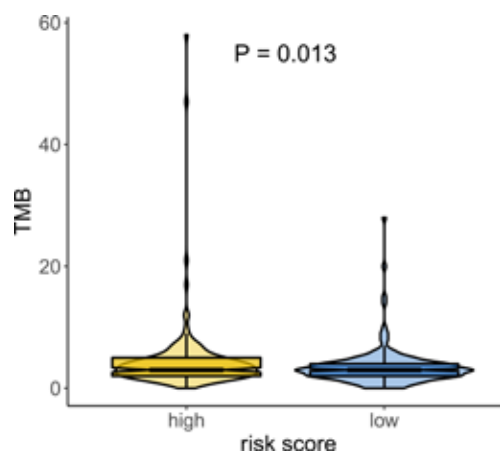

**Figure S1** Total mutational burden (TMB) scores of hepatocellular carcinoma (HCC) patients in the high-and low-risk groups.
